# Supplementary material for: A simple assay to probe disease-associated enzyme activity using glycosaminoglycan-assisted synthesized gold nanoparticles
Source: Royal Society of Chemistry journal article supplement (doi:10.1039/b813210k), 2008-01-01
Supplement: b813210k.pdf [file b813210k.pdf]

**Supplementary information for manuscript:**

**An assay for disease-associated enzyme activity with  
glycosaminoglycan-assisted synthesized gold nanoparticles**

Zhihui Ban†\*, Carlos J. Bosques† and Ram Sasisekharan\*

*Biological Engineering Division, Harvard-MIT Division of Health Sciences and Technology,  
Center for Environmental Health Sciences, Center for Biomedical Engineering,*

*Massachusetts Institute of Technology*

*15-561, 77 Massachusetts Avenue, Cambridge, Massachusetts 02139 (USA)*

*E-mail: zban@mail.rochester.edu, rams@mit.edu*

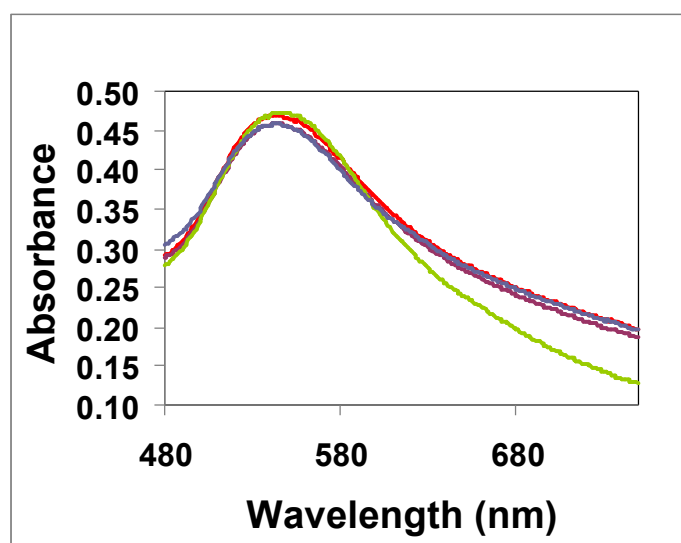

**Figure S1:** Effects of different control samples on the photophysical properties of the heparan sulphate gold nanoparticles. For each sample, 1 ml of serum (purple), 1 ml of plasma (red) or 1 ml of 10% w/v BSA (blue) or 1 ml of PBS buffer pH 7.4 as reference (green) were added to a solution containing 1.5 ml of 51.2  $\mu\text{g/ml}$  heparan sulfate–GNP in water and 0.4 ml of PBS buffer pH 7.4. Spectra for heparan sulfate–GNP in buffer alone are shown in blue.

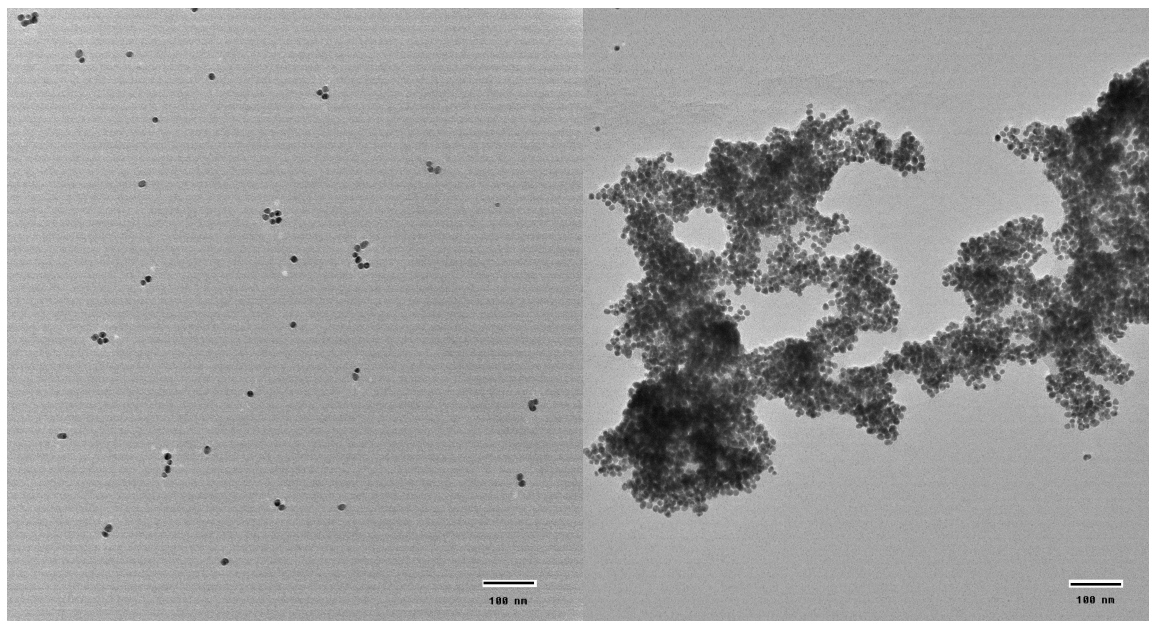

**Figure S2:** TEM of haparan sulfate-GNPs (25.6  $\mu\text{g/ml}$ ) before (left) and after (right) treatment with heparinase III enzyme. Bar scale = 100 nm.
